# Supplementary material for: Genome-wide analysis revealed the dysregulation of RNA binding protein-correlated alternative splicing events in myocardial ischemia reperfusion injury
Source: PubMed Central journal article supplement (PMC10585833; doi:10.1186/s12920-023-01706-5), 2023-10-19
Supplement: 12920_2023_1706_MOESM2_ESM.pdf [file 12920_2023_1706_MOESM2_ESM.pdf]

**Table S1. The PCR primer sequence table. F: forward; R: reverse; M: model; AS: alternative spliced.**

|              |                        |
|--------------|------------------------|
| Tagln2-F     | GAAAGAACATGGCTTGTGT    |
| Tagln2-R     | TAGGAAACCAGTTGGGATC    |
| Grsf1-F      | GCTATTAATGTCCTTACCAGTC |
| Grsf1-R      | AAGTCTAGGCAACCTTCAC    |
| Vasp-F       | AGAACAAGAGAAGGTGAGAC   |
| Vasp-R       | CTGGCTGCTGATTGGATA     |
| Idh2-F       | CTTGAGCCAGGATGTCAG     |
| Idh2-R       | GCACTATAAGACTGACTTCG   |
| Uqcr1-F      | TTCCAGACCTTCAACATCTC   |
| Uqcr1-R      | CTTGCAGGAAGAAGACCAT    |
| Pdia6-F      | AGGATTCCCTACAATCAAGA   |
| Pdia6-R      | GGGCATTATCAGAGAACAAA   |
| Eif5-F       | ACACTTAGGAAGGTCTTGG    |
| Eif5-R       | TCAATAGAGCAACGAAGGA    |
| Ndr2-F       | AACATACAAGCCTTCTCAAC   |
| Ndr2-R       | GCCAGAGTAAGCAAGGAA     |
| Zfp3612-F    | GCATATTCATGTACCACCAA   |
| Zfp3612-R    | CCGAACTTGCCTTAAATCTT   |
| Fhl2-M/AS-F  | TCACAGGTATTGGCATAGAGT  |
| Fhl2-M-R     | CAGCATCAGGATTGCTGAAA   |
| Fhl2-AS-R    | CAAGACCAAGATTGCTGAAA   |
| Cd47-M/AS-F  | CCCTTTTGATTTTCAGGTTTG  |
| Cd47-AS-R    | TCTCTCCACTCGACAAACTT   |
| Cd47-M-R     | TGGTTGGAAGCGACAAACTT   |
| Vegfa-M/AS-F | GACGATGATGGCGTGGTGGT   |
| Vegfa-AS-R   | GTACTIONGAGATGTGACAAG  |
| Vegfa-M-R    | AGCCAGAAAAATGTGACAAG   |
| Fbln2-M/AS-F | GTGTCGTGTTGTTGGGACA    |
| Fbln2-AS-R   | TCGTCTTGGTCTTCACAGGA   |
| Fbln2-M-R    | TCATTGATGTCTTCACAGGA   |
| Mttr3-M/AS-F | TTTGAAGTGGCAGCAATAGG   |
| Mttr3-AS-R   | ATCAAACGTGGAATTGTGGG   |
| Mttr3-M-R    | ACCACTGCAGGAATTGTGGG   |
| Cdc42-M-F    | TTAGGCCTTTCTGTGTGAGG   |
| Cdc42-AS-F   | TCAGACCTCTCTGTGTGAGG   |
| Cdc42-M/AS-R | CCTTTCTTGCTTGTGGGAC    |
| Gapdh-F      | GGAGATGCTCAGTGTGG      |
| Gapdh-R      | TGACAATGAATACGGCTACA   |
